# Supplementary material for: The nasal mycobiome of individuals with allergic rhinitis and asthma differs from that of healthy controls in composition, structure and function
Source: PubMed Central journal article supplement (PMC11685215; doi:10.3389/fmicb.2024.1464257), 2024-12-17

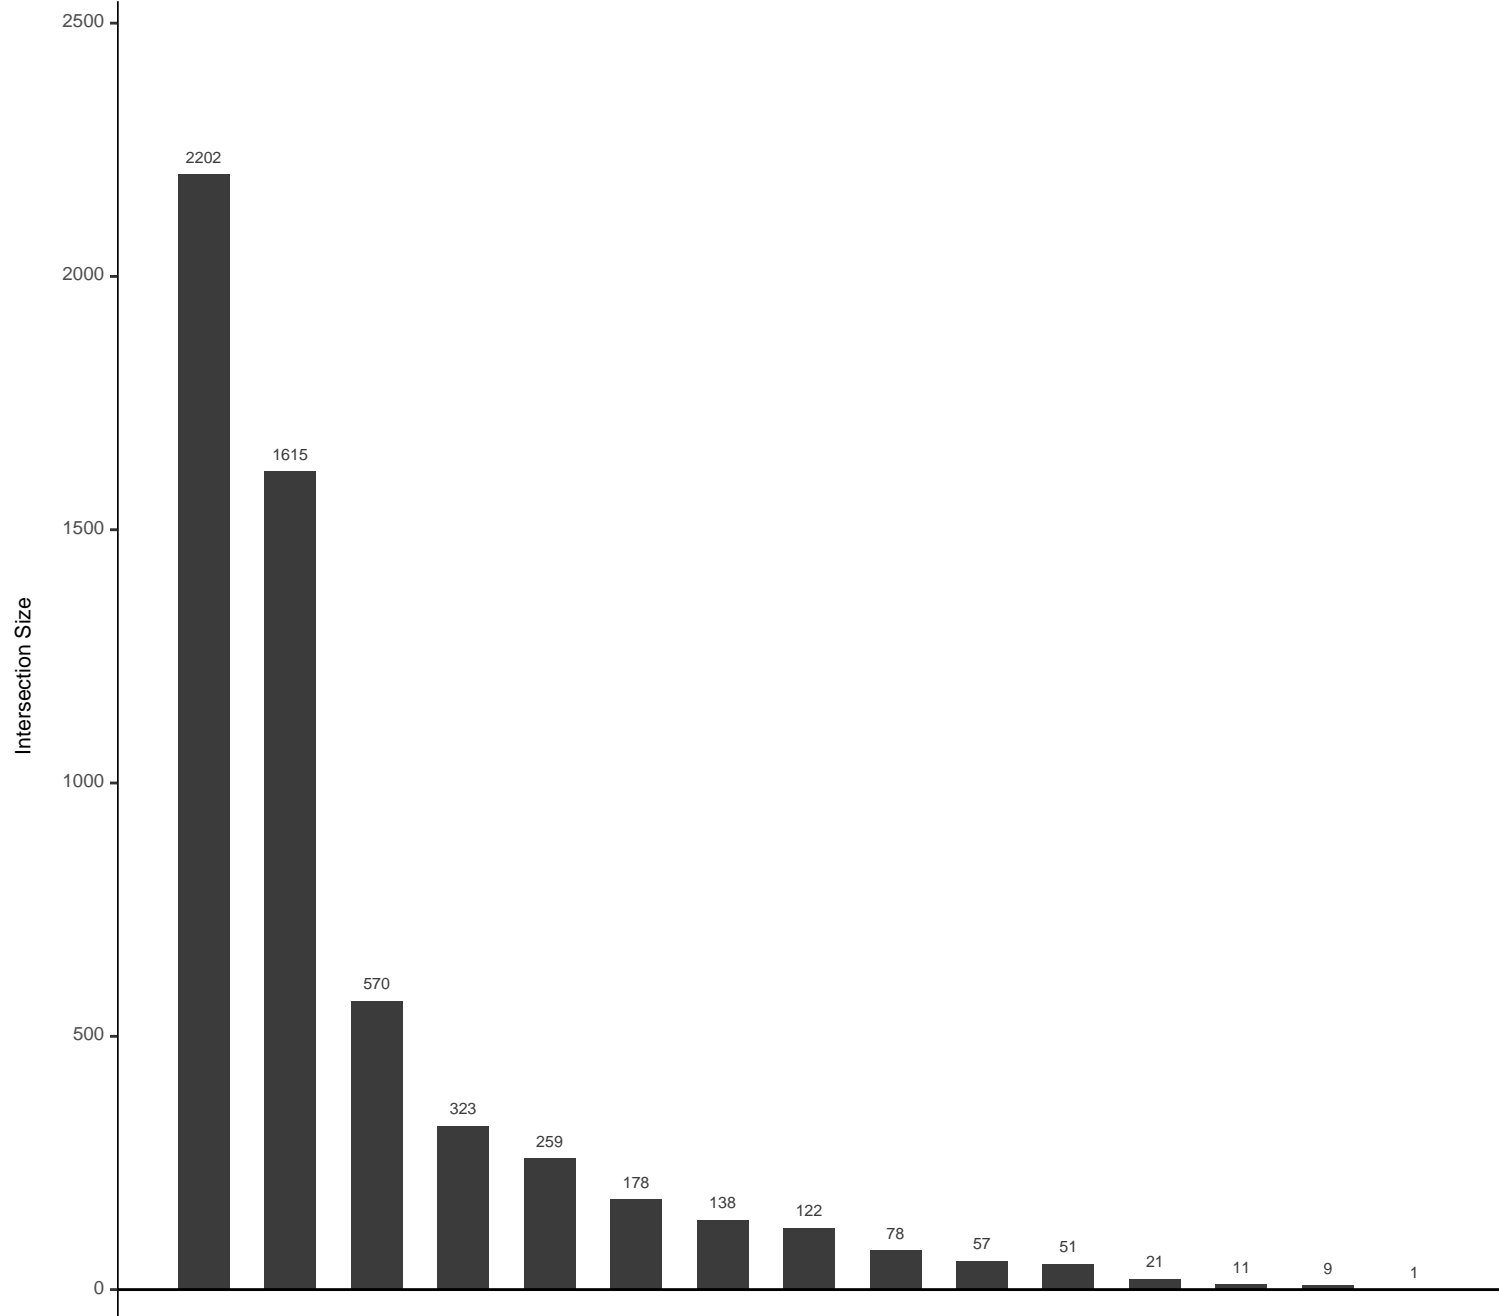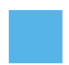

AS

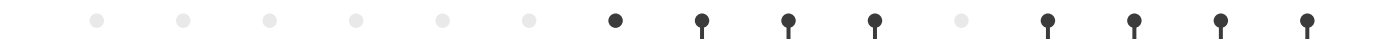

AR

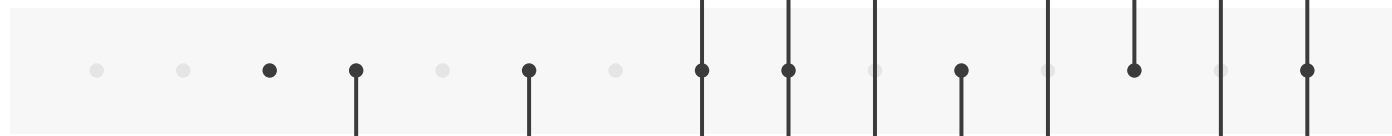

CT

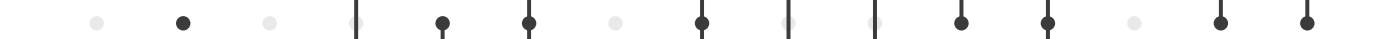

ARAS

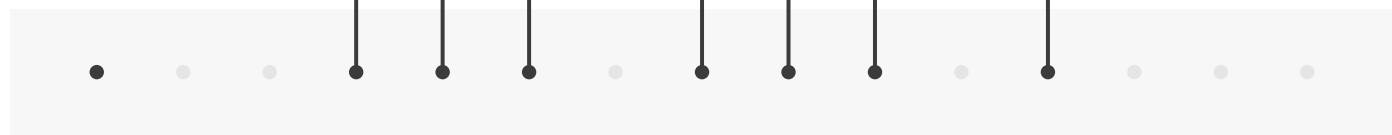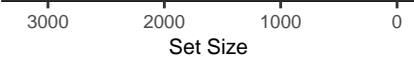

Supplement: Data_Sheet_1.pdf [file Data_Sheet_1.pdf]
